# Supplementary material for: 3-D printed injection system for capillary electrophoresis
Source: Royal Society of Chemistry journal article supplement (doi:10.1039/d2ay00075j), 2022-01-01
Supplement: d2ay00075j1.stp [file d2ay00075j1.stp]

ISO-10303-21;
HEADER;
/* Generated by software containing ST-Developer
 * from STEP Tools, Inc. (www.steptools.com) 
 */

FILE_DESCRIPTION(
/* description */ ('',
'CAx-IF Rec.Pracs.---Representation and Presentation of Product Manufa
cturing Information (PMI)---3.8---2014-02-18'),
/* implementation_level */ '2;1');

FILE_NAME(
/* name */ 
'C:\\Users\\Tony\\Desktop\\Injection Block\\bonnie bottom final for 3d.
stp',
/* time_stamp */ '2016-07-29T19:04:35-04:00',
/* author */ ('Tony'),
/* organization */ (''),
/* preprocessor_version */ 'ST-DEVELOPER v16.5',
/* originating_system */ 'Autodesk Inventor 2017',
/* authorisation */ '');

FILE_SCHEMA (('AP242_MANAGED_MODEL_BASED_3D_ENGINEERING_MIM_LF { 1 0 10303 442 1 1 4 }'));
ENDSEC;

DATA;
#10=MECHANICAL_DESIGN_GEOMETRIC_PRESENTATION_REPRESENTATION('',(#13),#749);
#11=SHAPE_REPRESENTATION_RELATIONSHIP('SRR','None',#761,#12);
#12=ADVANCED_BREP_SHAPE_REPRESENTATION('',(#14),#748);
#13=STYLED_ITEM('',(#771),#14);
#14=MANIFOLD_SOLID_BREP('Solid2',#447);
#15=LINE('',#646,#55);
#16=LINE('',#648,#56);
#17=LINE('',#650,#57);
#18=LINE('',#651,#58);
#19=LINE('',#654,#59);
#20=LINE('',#656,#60);
#21=LINE('',#657,#61);
#22=LINE('',#660,#62);
#23=LINE('',#662,#63);
#24=LINE('',#663,#64);
#25=LINE('',#665,#65);
#26=LINE('',#666,#66);
#27=LINE('',#671,#67);
#28=LINE('',#673,#68);
#29=LINE('',#675,#69);
#30=LINE('',#676,#70);
#31=LINE('',#679,#71);
#32=LINE('',#681,#72);
#33=LINE('',#682,#73);
#34=LINE('',#685,#74);
#35=LINE('',#687,#75);
#36=LINE('',#688,#76);
#37=LINE('',#690,#77);
#38=LINE('',#691,#78);
#39=LINE('',#701,#79);
#40=LINE('',#704,#80);
#41=LINE('',#707,#81);
#42=LINE('',#709,#82);
#43=LINE('',#710,#83);
#44=LINE('',#716,#84);
#45=LINE('',#719,#85);
#46=LINE('',#721,#86);
#47=LINE('',#722,#87);
#48=LINE('',#728,#88);
#49=LINE('',#731,#89);
#50=LINE('',#733,#90);
#51=LINE('',#734,#91);
#52=LINE('',#740,#92);
#53=LINE('',#742,#93);
#54=LINE('',#743,#94);
#55=VECTOR('',#525,0.393700787401575);
#56=VECTOR('',#526,0.393700787401575);
#57=VECTOR('',#527,0.393700787401575);
#58=VECTOR('',#528,0.393700787401575);
#59=VECTOR('',#531,0.393700787401575);
#60=VECTOR('',#532,0.393700787401575);
#61=VECTOR('',#533,0.393700787401575);
#62=VECTOR('',#536,0.393700787401575);
#63=VECTOR('',#537,0.393700787401575);
#64=VECTOR('',#538,0.393700787401575);
#65=VECTOR('',#541,0.393700787401575);
#66=VECTOR('',#542,0.393700787401575);
#67=VECTOR('',#547,0.393700787401575);
#68=VECTOR('',#548,0.393700787401575);
#69=VECTOR('',#549,0.393700787401575);
#70=VECTOR('',#550,0.393700787401575);
#71=VECTOR('',#553,0.393700787401575);
#72=VECTOR('',#554,0.393700787401575);
#73=VECTOR('',#555,0.393700787401575);
#74=VECTOR('',#558,0.393700787401575);
#75=VECTOR('',#559,0.393700787401575);
#76=VECTOR('',#560,0.393700787401575);
#77=VECTOR('',#563,0.393700787401575);
#78=VECTOR('',#564,0.393700787401575);
#79=VECTOR('',#575,0.393700787401575);
#80=VECTOR('',#578,0.393700787401575);
#81=VECTOR('',#581,0.393700787401575);
#82=VECTOR('',#582,0.393700787401575);
#83=VECTOR('',#583,0.393700787401575);
#84=VECTOR('',#590,0.393700787401575);
#85=VECTOR('',#593,0.393700787401575);
#86=VECTOR('',#594,0.393700787401575);
#87=VECTOR('',#595,0.393700787401575);
#88=VECTOR('',#602,0.393700787401575);
#89=VECTOR('',#605,0.393700787401575);
#90=VECTOR('',#606,0.393700787401575);
#91=VECTOR('',#607,0.393700787401575);
#92=VECTOR('',#614,0.393700787401575);
#93=VECTOR('',#617,0.393700787401575);
#94=VECTOR('',#618,0.393700787401575);
#95=FACE_BOUND('',#143,.T.);
#96=FACE_BOUND('',#145,.T.);
#97=FACE_BOUND('',#147,.T.);
#98=FACE_BOUND('',#149,.T.);
#99=FACE_BOUND('',#161,.T.);
#100=FACE_BOUND('',#171,.T.);
#101=FACE_BOUND('',#172,.T.);
#102=FACE_BOUND('',#173,.T.);
#103=FACE_BOUND('',#175,.T.);
#104=FACE_BOUND('',#176,.T.);
#105=FACE_BOUND('',#177,.T.);
#106=FACE_BOUND('',#178,.T.);
#107=CYLINDRICAL_SURFACE('',#457,0.11);
#108=CYLINDRICAL_SURFACE('',#461,0.0625);
#109=CYLINDRICAL_SURFACE('',#464,0.0625);
#110=CYLINDRICAL_SURFACE('',#477,0.17);
#111=CYLINDRICAL_SURFACE('',#479,1.25);
#112=CYLINDRICAL_SURFACE('',#483,1.25);
#113=CYLINDRICAL_SURFACE('',#487,1.25);
#114=CYLINDRICAL_SURFACE('',#491,1.25);
#115=FACE_OUTER_BOUND('',#141,.T.);
#116=FACE_OUTER_BOUND('',#142,.T.);
#117=FACE_OUTER_BOUND('',#144,.T.);
#118=FACE_OUTER_BOUND('',#146,.T.);
#119=FACE_OUTER_BOUND('',#148,.T.);
#120=FACE_OUTER_BOUND('',#150,.T.);
#121=FACE_OUTER_BOUND('',#151,.T.);
#122=FACE_OUTER_BOUND('',#152,.T.);
#123=FACE_OUTER_BOUND('',#153,.T.);
#124=FACE_OUTER_BOUND('',#154,.T.);
#125=FACE_OUTER_BOUND('',#155,.T.);
#126=FACE_OUTER_BOUND('',#156,.T.);
#127=FACE_OUTER_BOUND('',#157,.T.);
#128=FACE_OUTER_BOUND('',#158,.T.);
#129=FACE_OUTER_BOUND('',#159,.T.);
#130=FACE_OUTER_BOUND('',#160,.T.);
#131=FACE_OUTER_BOUND('',#162,.T.);
#132=FACE_OUTER_BOUND('',#163,.T.);
#133=FACE_OUTER_BOUND('',#164,.T.);
#134=FACE_OUTER_BOUND('',#165,.T.);
#135=FACE_OUTER_BOUND('',#166,.T.);
#136=FACE_OUTER_BOUND('',#167,.T.);
#137=FACE_OUTER_BOUND('',#168,.T.);
#138=FACE_OUTER_BOUND('',#169,.T.);
#139=FACE_OUTER_BOUND('',#170,.T.);
#140=FACE_OUTER_BOUND('',#174,.T.);
#141=EDGE_LOOP('',(#291));
#142=EDGE_LOOP('',(#292));
#143=EDGE_LOOP('',(#293));
#144=EDGE_LOOP('',(#294));
#145=EDGE_LOOP('',(#295));
#146=EDGE_LOOP('',(#296));
#147=EDGE_LOOP('',(#297));
#148=EDGE_LOOP('',(#298));
#149=EDGE_LOOP('',(#299));
#150=EDGE_LOOP('',(#300,#301,#302,#303));
#151=EDGE_LOOP('',(#304,#305,#306,#307));
#152=EDGE_LOOP('',(#308,#309,#310,#311));
#153=EDGE_LOOP('',(#312,#313,#314,#315));
#154=EDGE_LOOP('',(#316,#317,#318,#319));
#155=EDGE_LOOP('',(#320,#321,#322,#323));
#156=EDGE_LOOP('',(#324,#325,#326,#327));
#157=EDGE_LOOP('',(#328,#329,#330,#331));
#158=EDGE_LOOP('',(#332,#333,#334,#335));
#159=EDGE_LOOP('',(#336,#337,#338,#339));
#160=EDGE_LOOP('',(#340));
#161=EDGE_LOOP('',(#341));
#162=EDGE_LOOP('',(#342,#343,#344,#345));
#163=EDGE_LOOP('',(#346,#347,#348,#349));
#164=EDGE_LOOP('',(#350,#351,#352,#353));
#165=EDGE_LOOP('',(#354,#355,#356,#357));
#166=EDGE_LOOP('',(#358,#359,#360,#361));
#167=EDGE_LOOP('',(#362,#363,#364,#365));
#168=EDGE_LOOP('',(#366,#367,#368,#369));
#169=EDGE_LOOP('',(#370,#371,#372,#373));
#170=EDGE_LOOP('',(#374,#375,#376,#377,#378,#379,#380,#381));
#171=EDGE_LOOP('',(#382));
#172=EDGE_LOOP('',(#383));
#173=EDGE_LOOP('',(#384));
#174=EDGE_LOOP('',(#385,#386,#387,#388,#389,#390,#391,#392));
#175=EDGE_LOOP('',(#393));
#176=EDGE_LOOP('',(#394));
#177=EDGE_LOOP('',(#395,#396,#397,#398));
#178=EDGE_LOOP('',(#399,#400,#401,#402));
#179=CIRCLE('',#456,0.11);
#180=CIRCLE('',#458,0.11);
#181=CIRCLE('',#460,0.17);
#182=CIRCLE('',#462,0.0625);
#183=CIRCLE('',#463,0.0625000000000001);
#184=CIRCLE('',#465,0.0625);
#185=CIRCLE('',#466,0.0625);
#186=CIRCLE('',#478,0.17);
#187=CIRCLE('',#480,1.25);
#188=CIRCLE('',#481,1.25);
#189=CIRCLE('',#484,1.25);
#190=CIRCLE('',#485,1.25);
#191=CIRCLE('',#488,1.25);
#192=CIRCLE('',#489,1.25);
#193=CIRCLE('',#492,1.25);
#194=CIRCLE('',#493,1.25);
#195=VERTEX_POINT('',#625);
#196=VERTEX_POINT('',#628);
#197=VERTEX_POINT('',#631);
#198=VERTEX_POINT('',#634);
#199=VERTEX_POINT('',#636);
#200=VERTEX_POINT('',#639);
#201=VERTEX_POINT('',#641);
#202=VERTEX_POINT('',#644);
#203=VERTEX_POINT('',#645);
#204=VERTEX_POINT('',#647);
#205=VERTEX_POINT('',#649);
#206=VERTEX_POINT('',#653);
#207=VERTEX_POINT('',#655);
#208=VERTEX_POINT('',#659);
#209=VERTEX_POINT('',#661);
#210=VERTEX_POINT('',#669);
#211=VERTEX_POINT('',#670);
#212=VERTEX_POINT('',#672);
#213=VERTEX_POINT('',#674);
#214=VERTEX_POINT('',#678);
#215=VERTEX_POINT('',#680);
#216=VERTEX_POINT('',#684);
#217=VERTEX_POINT('',#686);
#218=VERTEX_POINT('',#694);
#219=VERTEX_POINT('',#697);
#220=VERTEX_POINT('',#698);
#221=VERTEX_POINT('',#700);
#222=VERTEX_POINT('',#702);
#223=VERTEX_POINT('',#706);
#224=VERTEX_POINT('',#708);
#225=VERTEX_POINT('',#712);
#226=VERTEX_POINT('',#714);
#227=VERTEX_POINT('',#718);
#228=VERTEX_POINT('',#720);
#229=VERTEX_POINT('',#724);
#230=VERTEX_POINT('',#726);
#231=VERTEX_POINT('',#730);
#232=VERTEX_POINT('',#732);
#233=VERTEX_POINT('',#736);
#234=VERTEX_POINT('',#738);
#235=EDGE_CURVE('',#195,#195,#179,.T.);
#236=EDGE_CURVE('',#196,#196,#180,.T.);
#237=EDGE_CURVE('',#197,#197,#181,.T.);
#238=EDGE_CURVE('',#198,#198,#182,.T.);
#239=EDGE_CURVE('',#199,#199,#183,.T.);
#240=EDGE_CURVE('',#200,#200,#184,.T.);
#241=EDGE_CURVE('',#201,#201,#185,.T.);
#242=EDGE_CURVE('',#202,#203,#15,.T.);
#243=EDGE_CURVE('',#202,#204,#16,.T.);
#244=EDGE_CURVE('',#204,#205,#17,.T.);
#245=EDGE_CURVE('',#203,#205,#18,.T.);
#246=EDGE_CURVE('',#206,#202,#19,.T.);
#247=EDGE_CURVE('',#206,#207,#20,.T.);
#248=EDGE_CURVE('',#207,#204,#21,.T.);
#249=EDGE_CURVE('',#208,#206,#22,.T.);
#250=EDGE_CURVE('',#208,#209,#23,.T.);
#251=EDGE_CURVE('',#209,#207,#24,.T.);
#252=EDGE_CURVE('',#203,#208,#25,.T.);
#253=EDGE_CURVE('',#205,#209,#26,.T.);
#254=EDGE_CURVE('',#210,#211,#27,.T.);
#255=EDGE_CURVE('',#210,#212,#28,.T.);
#256=EDGE_CURVE('',#212,#213,#29,.T.);
#257=EDGE_CURVE('',#211,#213,#30,.T.);
#258=EDGE_CURVE('',#214,#210,#31,.T.);
#259=EDGE_CURVE('',#214,#215,#32,.T.);
#260=EDGE_CURVE('',#215,#212,#33,.T.);
#261=EDGE_CURVE('',#216,#214,#34,.T.);
#262=EDGE_CURVE('',#216,#217,#35,.T.);
#263=EDGE_CURVE('',#217,#215,#36,.T.);
#264=EDGE_CURVE('',#211,#216,#37,.T.);
#265=EDGE_CURVE('',#213,#217,#38,.T.);
#266=EDGE_CURVE('',#218,#218,#186,.T.);
#267=EDGE_CURVE('',#219,#220,#187,.T.);
#268=EDGE_CURVE('',#220,#221,#39,.T.);
#269=EDGE_CURVE('',#222,#221,#188,.T.);
#270=EDGE_CURVE('',#219,#222,#40,.T.);
#271=EDGE_CURVE('',#223,#219,#41,.T.);
#272=EDGE_CURVE('',#224,#222,#42,.T.);
#273=EDGE_CURVE('',#223,#224,#43,.T.);
#274=EDGE_CURVE('',#225,#223,#189,.T.);
#275=EDGE_CURVE('',#226,#224,#190,.T.);
#276=EDGE_CURVE('',#225,#226,#44,.T.);
#277=EDGE_CURVE('',#227,#225,#45,.T.);
#278=EDGE_CURVE('',#228,#226,#46,.T.);
#279=EDGE_CURVE('',#227,#228,#47,.T.);
#280=EDGE_CURVE('',#229,#227,#191,.T.);
#281=EDGE_CURVE('',#230,#228,#192,.T.);
#282=EDGE_CURVE('',#229,#230,#48,.T.);
#283=EDGE_CURVE('',#231,#229,#49,.T.);
#284=EDGE_CURVE('',#232,#230,#50,.T.);
#285=EDGE_CURVE('',#231,#232,#51,.T.);
#286=EDGE_CURVE('',#233,#231,#193,.T.);
#287=EDGE_CURVE('',#234,#232,#194,.T.);
#288=EDGE_CURVE('',#233,#234,#52,.T.);
#289=EDGE_CURVE('',#220,#233,#53,.T.);
#290=EDGE_CURVE('',#221,#234,#54,.T.);
#291=ORIENTED_EDGE('',*,*,#235,.F.);
#292=ORIENTED_EDGE('',*,*,#235,.T.);
#293=ORIENTED_EDGE('',*,*,#236,.F.);
#294=ORIENTED_EDGE('',*,*,#237,.F.);
#295=ORIENTED_EDGE('',*,*,#236,.T.);
#296=ORIENTED_EDGE('',*,*,#238,.F.);
#297=ORIENTED_EDGE('',*,*,#239,.F.);
#298=ORIENTED_EDGE('',*,*,#240,.F.);
#299=ORIENTED_EDGE('',*,*,#241,.F.);
#300=ORIENTED_EDGE('',*,*,#242,.F.);
#301=ORIENTED_EDGE('',*,*,#243,.T.);
#302=ORIENTED_EDGE('',*,*,#244,.T.);
#303=ORIENTED_EDGE('',*,*,#245,.F.);
#304=ORIENTED_EDGE('',*,*,#246,.F.);
#305=ORIENTED_EDGE('',*,*,#247,.T.);
#306=ORIENTED_EDGE('',*,*,#248,.T.);
#307=ORIENTED_EDGE('',*,*,#243,.F.);
#308=ORIENTED_EDGE('',*,*,#249,.F.);
#309=ORIENTED_EDGE('',*,*,#250,.T.);
#310=ORIENTED_EDGE('',*,*,#251,.T.);
#311=ORIENTED_EDGE('',*,*,#247,.F.);
#312=ORIENTED_EDGE('',*,*,#252,.F.);
#313=ORIENTED_EDGE('',*,*,#245,.T.);
#314=ORIENTED_EDGE('',*,*,#253,.T.);
#315=ORIENTED_EDGE('',*,*,#250,.F.);
#316=ORIENTED_EDGE('',*,*,#253,.F.);
#317=ORIENTED_EDGE('',*,*,#244,.F.);
#318=ORIENTED_EDGE('',*,*,#248,.F.);
#319=ORIENTED_EDGE('',*,*,#251,.F.);
#320=ORIENTED_EDGE('',*,*,#254,.F.);
#321=ORIENTED_EDGE('',*,*,#255,.T.);
#322=ORIENTED_EDGE('',*,*,#256,.T.);
#323=ORIENTED_EDGE('',*,*,#257,.F.);
#324=ORIENTED_EDGE('',*,*,#258,.F.);
#325=ORIENTED_EDGE('',*,*,#259,.T.);
#326=ORIENTED_EDGE('',*,*,#260,.T.);
#327=ORIENTED_EDGE('',*,*,#255,.F.);
#328=ORIENTED_EDGE('',*,*,#261,.F.);
#329=ORIENTED_EDGE('',*,*,#262,.T.);
#330=ORIENTED_EDGE('',*,*,#263,.T.);
#331=ORIENTED_EDGE('',*,*,#259,.F.);
#332=ORIENTED_EDGE('',*,*,#264,.F.);
#333=ORIENTED_EDGE('',*,*,#257,.T.);
#334=ORIENTED_EDGE('',*,*,#265,.T.);
#335=ORIENTED_EDGE('',*,*,#262,.F.);
#336=ORIENTED_EDGE('',*,*,#265,.F.);
#337=ORIENTED_EDGE('',*,*,#256,.F.);
#338=ORIENTED_EDGE('',*,*,#260,.F.);
#339=ORIENTED_EDGE('',*,*,#263,.F.);
#340=ORIENTED_EDGE('',*,*,#237,.T.);
#341=ORIENTED_EDGE('',*,*,#266,.F.);
#342=ORIENTED_EDGE('',*,*,#267,.T.);
#343=ORIENTED_EDGE('',*,*,#268,.T.);
#344=ORIENTED_EDGE('',*,*,#269,.F.);
#345=ORIENTED_EDGE('',*,*,#270,.F.);
#346=ORIENTED_EDGE('',*,*,#271,.T.);
#347=ORIENTED_EDGE('',*,*,#270,.T.);
#348=ORIENTED_EDGE('',*,*,#272,.F.);
#349=ORIENTED_EDGE('',*,*,#273,.F.);
#350=ORIENTED_EDGE('',*,*,#274,.T.);
#351=ORIENTED_EDGE('',*,*,#273,.T.);
#352=ORIENTED_EDGE('',*,*,#275,.F.);
#353=ORIENTED_EDGE('',*,*,#276,.F.);
#354=ORIENTED_EDGE('',*,*,#277,.T.);
#355=ORIENTED_EDGE('',*,*,#276,.T.);
#356=ORIENTED_EDGE('',*,*,#278,.F.);
#357=ORIENTED_EDGE('',*,*,#279,.F.);
#358=ORIENTED_EDGE('',*,*,#280,.T.);
#359=ORIENTED_EDGE('',*,*,#279,.T.);
#360=ORIENTED_EDGE('',*,*,#281,.F.);
#361=ORIENTED_EDGE('',*,*,#282,.F.);
#362=ORIENTED_EDGE('',*,*,#283,.T.);
#363=ORIENTED_EDGE('',*,*,#282,.T.);
#364=ORIENTED_EDGE('',*,*,#284,.F.);
#365=ORIENTED_EDGE('',*,*,#285,.F.);
#366=ORIENTED_EDGE('',*,*,#286,.T.);
#367=ORIENTED_EDGE('',*,*,#285,.T.);
#368=ORIENTED_EDGE('',*,*,#287,.F.);
#369=ORIENTED_EDGE('',*,*,#288,.F.);
#370=ORIENTED_EDGE('',*,*,#289,.T.);
#371=ORIENTED_EDGE('',*,*,#288,.T.);
#372=ORIENTED_EDGE('',*,*,#290,.F.);
#373=ORIENTED_EDGE('',*,*,#268,.F.);
#374=ORIENTED_EDGE('',*,*,#290,.T.);
#375=ORIENTED_EDGE('',*,*,#287,.T.);
#376=ORIENTED_EDGE('',*,*,#284,.T.);
#377=ORIENTED_EDGE('',*,*,#281,.T.);
#378=ORIENTED_EDGE('',*,*,#278,.T.);
#379=ORIENTED_EDGE('',*,*,#275,.T.);
#380=ORIENTED_EDGE('',*,*,#272,.T.);
#381=ORIENTED_EDGE('',*,*,#269,.T.);
#382=ORIENTED_EDGE('',*,*,#239,.T.);
#383=ORIENTED_EDGE('',*,*,#241,.T.);
#384=ORIENTED_EDGE('',*,*,#266,.T.);
#385=ORIENTED_EDGE('',*,*,#289,.F.);
#386=ORIENTED_EDGE('',*,*,#267,.F.);
#387=ORIENTED_EDGE('',*,*,#271,.F.);
#388=ORIENTED_EDGE('',*,*,#274,.F.);
#389=ORIENTED_EDGE('',*,*,#277,.F.);
#390=ORIENTED_EDGE('',*,*,#280,.F.);
#391=ORIENTED_EDGE('',*,*,#283,.F.);
#392=ORIENTED_EDGE('',*,*,#286,.F.);
#393=ORIENTED_EDGE('',*,*,#238,.T.);
#394=ORIENTED_EDGE('',*,*,#240,.T.);
#395=ORIENTED_EDGE('',*,*,#242,.T.);
#396=ORIENTED_EDGE('',*,*,#252,.T.);
#397=ORIENTED_EDGE('',*,*,#249,.T.);
#398=ORIENTED_EDGE('',*,*,#246,.T.);
#399=ORIENTED_EDGE('',*,*,#254,.T.);
#400=ORIENTED_EDGE('',*,*,#264,.T.);
#401=ORIENTED_EDGE('',*,*,#261,.T.);
#402=ORIENTED_EDGE('',*,*,#258,.T.);
#403=PLANE('',#455);
#404=PLANE('',#459);
#405=PLANE('',#467);
#406=PLANE('',#468);
#407=PLANE('',#469);
#408=PLANE('',#470);
#409=PLANE('',#471);
#410=PLANE('',#472);
#411=PLANE('',#473);
#412=PLANE('',#474);
#413=PLANE('',#475);
#414=PLANE('',#476);
#415=PLANE('',#482);
#416=PLANE('',#486);
#417=PLANE('',#490);
#418=PLANE('',#494);
#419=PLANE('',#495);
#420=PLANE('',#496);
#421=ADVANCED_FACE('',(#115),#403,.T.);
#422=ADVANCED_FACE('',(#116,#95),#107,.F.);
#423=ADVANCED_FACE('',(#117,#96),#404,.T.);
#424=ADVANCED_FACE('',(#118,#97),#108,.F.);
#425=ADVANCED_FACE('',(#119,#98),#109,.F.);
#426=ADVANCED_FACE('',(#120),#405,.T.);
#427=ADVANCED_FACE('',(#121),#406,.T.);
#428=ADVANCED_FACE('',(#122),#407,.T.);
#429=ADVANCED_FACE('',(#123),#408,.T.);
#430=ADVANCED_FACE('',(#124),#409,.T.);
#431=ADVANCED_FACE('',(#125),#410,.T.);
#432=ADVANCED_FACE('',(#126),#411,.T.);
#433=ADVANCED_FACE('',(#127),#412,.T.);
#434=ADVANCED_FACE('',(#128),#413,.T.);
#435=ADVANCED_FACE('',(#129),#414,.T.);
#436=ADVANCED_FACE('',(#130,#99),#110,.F.);
#437=ADVANCED_FACE('',(#131),#111,.T.);
#438=ADVANCED_FACE('',(#132),#415,.T.);
#439=ADVANCED_FACE('',(#133),#112,.T.);
#440=ADVANCED_FACE('',(#134),#416,.T.);
#441=ADVANCED_FACE('',(#135),#113,.T.);
#442=ADVANCED_FACE('',(#136),#417,.T.);
#443=ADVANCED_FACE('',(#137),#114,.T.);
#444=ADVANCED_FACE('',(#138),#418,.T.);
#445=ADVANCED_FACE('',(#139,#100,#101,#102),#419,.T.);
#446=ADVANCED_FACE('',(#140,#103,#104,#105,#106),#420,.T.);
#447=CLOSED_SHELL('',(#421,#422,#423,#424,#425,#426,#427,#428,#429,#430,
#431,#432,#433,#434,#435,#436,#437,#438,#439,#440,#441,#442,#443,#444,#445,
#446));
#448=DATE_TIME_ROLE('creation_date');
#449=APPLIED_DATE_AND_TIME_ASSIGNMENT(#450,#448,(#763));
#450=DATE_AND_TIME(#451,#452);
#451=CALENDAR_DATE(2016,21,6);
#452=LOCAL_TIME(14,2,57.,#453);
#453=COORDINATED_UNIVERSAL_TIME_OFFSET(0,0,.BEHIND.);
#454=AXIS2_PLACEMENT_3D('placement',#623,#497,#498);
#455=AXIS2_PLACEMENT_3D('',#624,#499,#500);
#456=AXIS2_PLACEMENT_3D('',#626,#501,#502);
#457=AXIS2_PLACEMENT_3D('',#627,#503,#504);
#458=AXIS2_PLACEMENT_3D('',#629,#505,#506);
#459=AXIS2_PLACEMENT_3D('',#630,#507,#508);
#460=AXIS2_PLACEMENT_3D('',#632,#509,#510);
#461=AXIS2_PLACEMENT_3D('',#633,#511,#512);
#462=AXIS2_PLACEMENT_3D('',#635,#513,#514);
#463=AXIS2_PLACEMENT_3D('',#637,#515,#516);
#464=AXIS2_PLACEMENT_3D('',#638,#517,#518);
#465=AXIS2_PLACEMENT_3D('',#640,#519,#520);
#466=AXIS2_PLACEMENT_3D('',#642,#521,#522);
#467=AXIS2_PLACEMENT_3D('',#643,#523,#524);
#468=AXIS2_PLACEMENT_3D('',#652,#529,#530);
#469=AXIS2_PLACEMENT_3D('',#658,#534,#535);
#470=AXIS2_PLACEMENT_3D('',#664,#539,#540);
#471=AXIS2_PLACEMENT_3D('',#667,#543,#544);
#472=AXIS2_PLACEMENT_3D('',#668,#545,#546);
#473=AXIS2_PLACEMENT_3D('',#677,#551,#552);
#474=AXIS2_PLACEMENT_3D('',#683,#556,#557);
#475=AXIS2_PLACEMENT_3D('',#689,#561,#562);
#476=AXIS2_PLACEMENT_3D('',#692,#565,#566);
#477=AXIS2_PLACEMENT_3D('',#693,#567,#568);
#478=AXIS2_PLACEMENT_3D('',#695,#569,#570);
#479=AXIS2_PLACEMENT_3D('',#696,#571,#572);
#480=AXIS2_PLACEMENT_3D('',#699,#573,#574);
#481=AXIS2_PLACEMENT_3D('',#703,#576,#577);
#482=AXIS2_PLACEMENT_3D('',#705,#579,#580);
#483=AXIS2_PLACEMENT_3D('',#711,#584,#585);
#484=AXIS2_PLACEMENT_3D('',#713,#586,#587);
#485=AXIS2_PLACEMENT_3D('',#715,#588,#589);
#486=AXIS2_PLACEMENT_3D('',#717,#591,#592);
#487=AXIS2_PLACEMENT_3D('',#723,#596,#597);
#488=AXIS2_PLACEMENT_3D('',#725,#598,#599);
#489=AXIS2_PLACEMENT_3D('',#727,#600,#601);
#490=AXIS2_PLACEMENT_3D('',#729,#603,#604);
#491=AXIS2_PLACEMENT_3D('',#735,#608,#609);
#492=AXIS2_PLACEMENT_3D('',#737,#610,#611);
#493=AXIS2_PLACEMENT_3D('',#739,#612,#613);
#494=AXIS2_PLACEMENT_3D('',#741,#615,#616);
#495=AXIS2_PLACEMENT_3D('',#744,#619,#620);
#496=AXIS2_PLACEMENT_3D('',#745,#621,#622);
#497=DIRECTION('axis',(0.,0.,1.));
#498=DIRECTION('refdir',(1.,0.,0.));
#499=DIRECTION('center_axis',(1.,0.,0.));
#500=DIRECTION('ref_axis',(0.,0.,-1.));
#501=DIRECTION('center_axis',(-1.,1.93834580374498E-16,6.21001880740775E-17));
#502=DIRECTION('ref_axis',(0.,0.813826036051075,0.581108581114919));
#503=DIRECTION('center_axis',(1.,0.,0.));
#504=DIRECTION('ref_axis',(0.,1.,0.));
#505=DIRECTION('center_axis',(-1.,0.,0.));
#506=DIRECTION('ref_axis',(0.,0.813826036051075,0.581108581114919));
#507=DIRECTION('center_axis',(1.,0.,0.));
#508=DIRECTION('ref_axis',(0.,0.,-1.));
#509=DIRECTION('center_axis',(-1.,0.,0.));
#510=DIRECTION('ref_axis',(0.,0.813826036051075,0.581108581114919));
#511=DIRECTION('center_axis',(1.,0.,0.));
#512=DIRECTION('ref_axis',(0.,-1.,-1.3987061727561E-15));
#513=DIRECTION('center_axis',(1.,0.,0.));
#514=DIRECTION('ref_axis',(0.,-0.813826036051083,0.581108581114908));
#515=DIRECTION('center_axis',(-1.,0.,0.));
#516=DIRECTION('ref_axis',(0.,0.813826036051078,0.581108581114915));
#517=DIRECTION('center_axis',(1.,0.,0.));
#518=DIRECTION('ref_axis',(0.,-1.,-1.3987061727561E-15));
#519=DIRECTION('center_axis',(1.,0.,0.));
#520=DIRECTION('ref_axis',(0.,-0.813826036051078,0.581108581114915));
#521=DIRECTION('center_axis',(-1.,0.,0.));
#522=DIRECTION('ref_axis',(0.,0.813826036051075,0.58110858111492));
#523=DIRECTION('center_axis',(0.,0.,-1.));
#524=DIRECTION('ref_axis',(-1.,0.,0.));
#525=DIRECTION('',(0.,-1.,0.));
#526=DIRECTION('',(1.,0.,0.));
#527=DIRECTION('',(0.,-1.,0.));
#528=DIRECTION('',(1.,0.,0.));
#529=DIRECTION('center_axis',(0.,-1.,0.));
#530=DIRECTION('ref_axis',(0.,0.,-1.));
#531=DIRECTION('',(0.,0.,1.));
#532=DIRECTION('',(1.,0.,0.));
#533=DIRECTION('',(0.,0.,1.));
#534=DIRECTION('center_axis',(0.,0.,1.));
#535=DIRECTION('ref_axis',(1.,0.,0.));
#536=DIRECTION('',(0.,1.,0.));
#537=DIRECTION('',(1.,0.,0.));
#538=DIRECTION('',(0.,1.,0.));
#539=DIRECTION('center_axis',(0.,1.,0.));
#540=DIRECTION('ref_axis',(0.,0.,1.));
#541=DIRECTION('',(0.,0.,-1.));
#542=DIRECTION('',(0.,0.,-1.));
#543=DIRECTION('center_axis',(-1.,0.,0.));
#544=DIRECTION('ref_axis',(0.,0.,1.));
#545=DIRECTION('center_axis',(0.,0.,1.));
#546=DIRECTION('ref_axis',(1.,0.,0.));
#547=DIRECTION('',(0.,1.,0.));
#548=DIRECTION('',(1.,0.,0.));
#549=DIRECTION('',(0.,1.,0.));
#550=DIRECTION('',(1.,0.,0.));
#551=DIRECTION('center_axis',(0.,1.,0.));
#552=DIRECTION('ref_axis',(0.,0.,1.));
#553=DIRECTION('',(0.,0.,-1.));
#554=DIRECTION('',(1.,0.,0.));
#555=DIRECTION('',(0.,0.,-1.));
#556=DIRECTION('center_axis',(0.,0.,-1.));
#557=DIRECTION('ref_axis',(-1.,0.,0.));
#558=DIRECTION('',(0.,-1.,0.));
#559=DIRECTION('',(1.,0.,0.));
#560=DIRECTION('',(0.,-1.,0.));
#561=DIRECTION('center_axis',(0.,-1.,0.));
#562=DIRECTION('ref_axis',(0.,0.,-1.));
#563=DIRECTION('',(0.,0.,1.));
#564=DIRECTION('',(0.,0.,1.));
#565=DIRECTION('center_axis',(-1.,0.,0.));
#566=DIRECTION('ref_axis',(0.,0.,1.));
#567=DIRECTION('center_axis',(1.,0.,0.));
#568=DIRECTION('ref_axis',(0.,1.,0.));
#569=DIRECTION('center_axis',(-1.,0.,0.));
#570=DIRECTION('ref_axis',(0.,0.813826036051075,0.581108581114919));
#571=DIRECTION('center_axis',(1.,0.,0.));
#572=DIRECTION('ref_axis',(0.,0.6,-0.8));
#573=DIRECTION('center_axis',(1.,0.,0.));
#574=DIRECTION('ref_axis',(0.,-0.910000000000001,0.414608248832556));
#575=DIRECTION('',(1.,0.,0.));
#576=DIRECTION('center_axis',(1.,0.,0.));
#577=DIRECTION('ref_axis',(0.,-0.910000000000001,0.414608248832556));
#578=DIRECTION('',(1.,0.,0.));
#579=DIRECTION('center_axis',(0.,0.,1.));
#580=DIRECTION('ref_axis',(1.,0.,0.));
#581=DIRECTION('',(0.,-1.,0.));
#582=DIRECTION('',(0.,-1.,0.));
#583=DIRECTION('',(1.,0.,0.));
#584=DIRECTION('center_axis',(1.,0.,0.));
#585=DIRECTION('ref_axis',(0.,-0.91,-0.414608248832557));
#586=DIRECTION('center_axis',(1.,0.,0.));
#587=DIRECTION('ref_axis',(0.,0.600000000000001,0.799999999999999));
#588=DIRECTION('center_axis',(1.,0.,0.));
#589=DIRECTION('ref_axis',(0.,0.600000000000001,0.799999999999999));
#590=DIRECTION('',(1.,0.,0.));
#591=DIRECTION('center_axis',(0.,1.,0.));
#592=DIRECTION('ref_axis',(0.,0.,1.));
#593=DIRECTION('',(0.,0.,1.));
#594=DIRECTION('',(0.,0.,1.));
#595=DIRECTION('',(1.,0.,0.));
#596=DIRECTION('center_axis',(1.,0.,0.));
#597=DIRECTION('ref_axis',(0.,-0.6,0.8));
#598=DIRECTION('center_axis',(1.,0.,0.));
#599=DIRECTION('ref_axis',(0.,0.910000000000001,-0.414608248832556));
#600=DIRECTION('center_axis',(1.,0.,0.));
#601=DIRECTION('ref_axis',(0.,0.910000000000001,-0.414608248832556));
#602=DIRECTION('',(1.,0.,0.));
#603=DIRECTION('center_axis',(0.,0.,-1.));
#604=DIRECTION('ref_axis',(-1.,0.,0.));
#605=DIRECTION('',(0.,1.,0.));
#606=DIRECTION('',(0.,1.,0.));
#607=DIRECTION('',(1.,0.,0.));
#608=DIRECTION('center_axis',(1.,0.,0.));
#609=DIRECTION('ref_axis',(0.,0.91,0.414608248832557));
#610=DIRECTION('center_axis',(1.,0.,0.));
#611=DIRECTION('ref_axis',(0.,-0.600000000000001,-0.799999999999999));
#612=DIRECTION('center_axis',(1.,0.,0.));
#613=DIRECTION('ref_axis',(0.,-0.600000000000001,-0.799999999999999));
#614=DIRECTION('',(1.,0.,0.));
#615=DIRECTION('center_axis',(0.,-1.,0.));
#616=DIRECTION('ref_axis',(0.,0.,-1.));
#617=DIRECTION('',(0.,0.,-1.));
#618=DIRECTION('',(0.,0.,-1.));
#619=DIRECTION('center_axis',(1.,0.,0.));
#620=DIRECTION('ref_axis',(0.,0.,-1.));
#621=DIRECTION('center_axis',(-1.,0.,0.));
#622=DIRECTION('ref_axis',(0.,0.,1.));
#623=CARTESIAN_POINT('',(0.,0.,0.));
#624=CARTESIAN_POINT('Origin',(0.375,-0.11,0.));
#625=CARTESIAN_POINT('',(0.375,0.11,1.34711147906209E-17));
#626=CARTESIAN_POINT('Origin',(0.375,0.,-1.9742912659548E-17));
#627=CARTESIAN_POINT('Origin',(0.6,-4.37095678986282E-17,1.34706698920461E-17));
#628=CARTESIAN_POINT('',(0.825,0.11,1.34711147906209E-17));
#629=CARTESIAN_POINT('Origin',(0.825,0.,-1.9742912659548E-17));
#630=CARTESIAN_POINT('Origin',(0.825,-0.17,0.));
#631=CARTESIAN_POINT('',(0.825,0.17,2.0818995585505E-17));
#632=CARTESIAN_POINT('Origin',(0.825,2.18547839493141E-17,-3.11479012252725E-17));
#633=CARTESIAN_POINT('Origin',(0.4375,0.8875,0.5));
#634=CARTESIAN_POINT('',(0.,0.825,0.5));
#635=CARTESIAN_POINT('Origin',(0.,0.8875,0.500000000000001));
#636=CARTESIAN_POINT('',(0.875,0.95,0.5));
#637=CARTESIAN_POINT('Origin',(0.875,0.8875,0.5));
#638=CARTESIAN_POINT('Origin',(0.4375,-0.8875,0.5));
#639=CARTESIAN_POINT('',(0.,-0.95,0.5));
#640=CARTESIAN_POINT('Origin',(0.,-0.8875,0.5));
#641=CARTESIAN_POINT('',(0.875,-0.825,0.5));
#642=CARTESIAN_POINT('Origin',(0.875,-0.8875,0.5));
#643=CARTESIAN_POINT('Origin',(0.,-1.011,0.325));
#644=CARTESIAN_POINT('',(0.,-0.9645,0.325));
#645=CARTESIAN_POINT('',(0.,-1.0575,0.325));
#646=CARTESIAN_POINT('',(0.,-0.9645,0.325));
#647=CARTESIAN_POINT('',(0.1,-0.9645,0.325));
#648=CARTESIAN_POINT('',(0.,-0.9645,0.325));
#649=CARTESIAN_POINT('',(0.1,-1.0575,0.325));
#650=CARTESIAN_POINT('',(0.1,-0.9645,0.325));
#651=CARTESIAN_POINT('',(0.,-1.0575,0.325));
#652=CARTESIAN_POINT('Origin',(0.,-0.9645,0.));
#653=CARTESIAN_POINT('',(0.,-0.9645,-0.325));
#654=CARTESIAN_POINT('',(0.,-0.9645,-0.325));
#655=CARTESIAN_POINT('',(0.1,-0.9645,-0.325));
#656=CARTESIAN_POINT('',(0.,-0.9645,-0.325));
#657=CARTESIAN_POINT('',(0.1,-0.9645,-0.325));
#658=CARTESIAN_POINT('Origin',(0.,-1.011,-0.325));
#659=CARTESIAN_POINT('',(0.,-1.0575,-0.325));
#660=CARTESIAN_POINT('',(0.,-1.0575,-0.325));
#661=CARTESIAN_POINT('',(0.1,-1.0575,-0.325));
#662=CARTESIAN_POINT('',(0.,-1.0575,-0.325));
#663=CARTESIAN_POINT('',(0.1,-1.0575,-0.325));
#664=CARTESIAN_POINT('Origin',(0.,-1.0575,0.));
#665=CARTESIAN_POINT('',(0.,-1.0575,0.325));
#666=CARTESIAN_POINT('',(0.1,-1.0575,0.325));
#667=CARTESIAN_POINT('Origin',(0.1,-1.0575,0.));
#668=CARTESIAN_POINT('Origin',(0.,1.011,-0.325));
#669=CARTESIAN_POINT('',(0.,0.9645,-0.325));
#670=CARTESIAN_POINT('',(0.,1.0575,-0.325));
#671=CARTESIAN_POINT('',(0.,0.9645,-0.325));
#672=CARTESIAN_POINT('',(0.1,0.9645,-0.325));
#673=CARTESIAN_POINT('',(0.,0.9645,-0.325));
#674=CARTESIAN_POINT('',(0.1,1.0575,-0.325));
#675=CARTESIAN_POINT('',(0.1,0.9645,-0.325));
#676=CARTESIAN_POINT('',(0.,1.0575,-0.325));
#677=CARTESIAN_POINT('Origin',(0.,0.9645,0.));
#678=CARTESIAN_POINT('',(0.,0.9645,0.325));
#679=CARTESIAN_POINT('',(0.,0.9645,0.325));
#680=CARTESIAN_POINT('',(0.1,0.9645,0.325));
#681=CARTESIAN_POINT('',(0.,0.9645,0.325));
#682=CARTESIAN_POINT('',(0.1,0.9645,0.325));
#683=CARTESIAN_POINT('Origin',(0.,1.011,0.325));
#684=CARTESIAN_POINT('',(0.,1.0575,0.325));
#685=CARTESIAN_POINT('',(0.,1.0575,0.325));
#686=CARTESIAN_POINT('',(0.1,1.0575,0.325));
#687=CARTESIAN_POINT('',(0.,1.0575,0.325));
#688=CARTESIAN_POINT('',(0.1,1.0575,0.325));
#689=CARTESIAN_POINT('Origin',(0.,1.0575,0.));
#690=CARTESIAN_POINT('',(0.,1.0575,-0.325));
#691=CARTESIAN_POINT('',(0.1,1.0575,-0.325));
#692=CARTESIAN_POINT('Origin',(0.1,0.9645,0.));
#693=CARTESIAN_POINT('Origin',(0.85,-2.18547839493141E-17,2.08183080149804E-17));
#694=CARTESIAN_POINT('',(0.875,0.17,2.0818995585505E-17));
#695=CARTESIAN_POINT('Origin',(0.875,2.18547839493141E-17,-3.11479012252725E-17));
#696=CARTESIAN_POINT('Origin',(0.4375,-4.37095678986282E-16,5.24514814783538E-16));
#697=CARTESIAN_POINT('',(0.,-0.75,1.));
#698=CARTESIAN_POINT('',(0.,-1.1375,0.518260311040697));
#699=CARTESIAN_POINT('Origin',(0.,8.74191357972564E-17,1.92322098753964E-15));
#700=CARTESIAN_POINT('',(0.875,-1.1375,0.518260311040697));
#701=CARTESIAN_POINT('',(0.,-1.1375,0.518260311040697));
#702=CARTESIAN_POINT('',(0.875,-0.75,1.));
#703=CARTESIAN_POINT('Origin',(0.875,8.74191357972564E-17,1.92322098753964E-15));
#704=CARTESIAN_POINT('',(0.,-0.75,1.));
#705=CARTESIAN_POINT('Origin',(0.,0.,1.));
#706=CARTESIAN_POINT('',(0.,0.75,1.));
#707=CARTESIAN_POINT('',(0.,0.75,1.));
#708=CARTESIAN_POINT('',(0.875,0.75,1.));
#709=CARTESIAN_POINT('',(0.875,0.75,1.));
#710=CARTESIAN_POINT('',(0.,0.75,1.));
#711=CARTESIAN_POINT('Origin',(0.4375,2.79741234551221E-15,-8.74191357972564E-17));
#712=CARTESIAN_POINT('',(0.,1.1375,0.518260311040697));
#713=CARTESIAN_POINT('Origin',(0.,1.74838271594513E-16,3.409346296093E-15));
#714=CARTESIAN_POINT('',(0.875,1.1375,0.518260311040697));
#715=CARTESIAN_POINT('Origin',(0.875,1.74838271594513E-16,3.409346296093E-15));
#716=CARTESIAN_POINT('',(0.,1.1375,0.518260311040697));
#717=CARTESIAN_POINT('Origin',(0.,1.1375,0.));
#718=CARTESIAN_POINT('',(0.,1.1375,-0.518260311040697));
#719=CARTESIAN_POINT('',(0.,1.1375,-0.518260311040697));
#720=CARTESIAN_POINT('',(0.875,1.1375,-0.518260311040697));
#721=CARTESIAN_POINT('',(0.875,1.1375,-0.518260311040697));
#722=CARTESIAN_POINT('',(0.,1.1375,-0.518260311040697));
#723=CARTESIAN_POINT('Origin',(0.4375,4.37095678986282E-16,-5.24514814783538E-16));
#724=CARTESIAN_POINT('',(0.,0.75,-1.));
#725=CARTESIAN_POINT('Origin',(0.,-8.74191357972564E-17,-1.92322098753964E-15));
#726=CARTESIAN_POINT('',(0.875,0.75,-1.));
#727=CARTESIAN_POINT('Origin',(0.875,-8.74191357972564E-17,-1.92322098753964E-15));
#728=CARTESIAN_POINT('',(0.,0.75,-1.));
#729=CARTESIAN_POINT('Origin',(0.,0.,-1.));
#730=CARTESIAN_POINT('',(0.,-0.75,-1.));
#731=CARTESIAN_POINT('',(0.,-0.75,-1.));
#732=CARTESIAN_POINT('',(0.875,-0.75,-1.));
#733=CARTESIAN_POINT('',(0.875,-0.75,-1.));
#734=CARTESIAN_POINT('',(0.,-0.75,-1.));
#735=CARTESIAN_POINT('Origin',(0.4375,-2.79741234551221E-15,8.74191357972564E-17));
#736=CARTESIAN_POINT('',(0.,-1.1375,-0.518260311040697));
#737=CARTESIAN_POINT('Origin',(0.,-1.74838271594513E-16,-3.409346296093E-15));
#738=CARTESIAN_POINT('',(0.875,-1.1375,-0.518260311040697));
#739=CARTESIAN_POINT('Origin',(0.875,-1.74838271594513E-16,-3.409346296093E-15));
#740=CARTESIAN_POINT('',(0.,-1.1375,-0.518260311040697));
#741=CARTESIAN_POINT('Origin',(0.,-1.1375,0.));
#742=CARTESIAN_POINT('',(0.,-1.1375,0.518260311040697));
#743=CARTESIAN_POINT('',(0.875,-1.1375,0.518260311040697));
#744=CARTESIAN_POINT('Origin',(0.875,-1.1375,0.));
#745=CARTESIAN_POINT('Origin',(0.,-1.1375,0.));
#746=UNCERTAINTY_MEASURE_WITH_UNIT(LENGTH_MEASURE(0.000393700787401575),
#750,'DISTANCE_ACCURACY_VALUE',
'Maximum model space distance between geometric entities at asserted c
onnectivities');
#747=UNCERTAINTY_MEASURE_WITH_UNIT(LENGTH_MEASURE(1.E-6),#751,
'DISTANCE_ACCURACY_VALUE',
'Maximum model space distance between geometric entities at asserted c
onnectivities');
#748=(
GEOMETRIC_REPRESENTATION_CONTEXT(3)
GLOBAL_UNCERTAINTY_ASSIGNED_CONTEXT((#746))
GLOBAL_UNIT_ASSIGNED_CONTEXT((#750,#756,#753))
REPRESENTATION_CONTEXT('','3D')
);
#749=(
GEOMETRIC_REPRESENTATION_CONTEXT(3)
GLOBAL_UNCERTAINTY_ASSIGNED_CONTEXT((#747))
GLOBAL_UNIT_ASSIGNED_CONTEXT((#751,#756,#753))
REPRESENTATION_CONTEXT('','3D')
);
#750=(
CONVERSION_BASED_UNIT('__CONSTANT UNIT inch',#752)
LENGTH_UNIT()
NAMED_UNIT(#755)
);
#751=(
LENGTH_UNIT()
NAMED_UNIT(*)
SI_UNIT(.MILLI.,.METRE.)
);
#752=LENGTH_MEASURE_WITH_UNIT(LENGTH_MEASURE(25.4),#751);
#753=(
NAMED_UNIT(*)
SI_UNIT($,.STERADIAN.)
SOLID_ANGLE_UNIT()
);
#754=DIMENSIONAL_EXPONENTS(0.,0.,0.,0.,0.,0.,0.);
#755=DIMENSIONAL_EXPONENTS(1.,0.,0.,0.,0.,0.,0.);
#756=(
CONVERSION_BASED_UNIT('degree',#758)
NAMED_UNIT(#754)
PLANE_ANGLE_UNIT()
);
#757=(
NAMED_UNIT(*)
PLANE_ANGLE_UNIT()
SI_UNIT($,.RADIAN.)
);
#758=PLANE_ANGLE_MEASURE_WITH_UNIT(PLANE_ANGLE_MEASURE(0.01745329252),#757);
#759=SHAPE_DEFINITION_REPRESENTATION(#760,#761);
#760=PRODUCT_DEFINITION_SHAPE('',$,#763);
#761=SHAPE_REPRESENTATION('',(#454),#748);
#762=PRODUCT_DEFINITION_CONTEXT('part definition',#767,'design');
#763=PRODUCT_DEFINITION('bonnie bottom final for 3d',
'bonnie bottom final for 3d',#764,#762);
#764=PRODUCT_DEFINITION_FORMATION('',$,#769);
#765=PRODUCT_RELATED_PRODUCT_CATEGORY('bonnie bottom final for 3d',
'bonnie bottom final for 3d',(#769));
#766=APPLICATION_PROTOCOL_DEFINITION('international standard',
'ap242_managed_model_based_3d_engineering',2011,#767);
#767=APPLICATION_CONTEXT('Managed model based 3d engineering');
#768=PRODUCT_CONTEXT('part definition',#767,'mechanical');
#769=PRODUCT('bonnie bottom final for 3d','bonnie bottom final for 3d',
$,(#768));
#770=PRESENTATION_STYLE_ASSIGNMENT((#772));
#771=PRESENTATION_STYLE_ASSIGNMENT((#773));
#772=SURFACE_STYLE_USAGE(.BOTH.,#774);
#773=SURFACE_STYLE_USAGE(.BOTH.,#775);
#774=SURFACE_SIDE_STYLE('',(#776));
#775=SURFACE_SIDE_STYLE('',(#777));
#776=SURFACE_STYLE_FILL_AREA(#778);
#777=SURFACE_STYLE_FILL_AREA(#779);
#778=FILL_AREA_STYLE('',(#780));
#779=FILL_AREA_STYLE('',(#781));
#780=FILL_AREA_STYLE_COLOUR('',#782);
#781=FILL_AREA_STYLE_COLOUR('',#783);
#782=COLOUR_RGB('',1.,1.,1.);
#783=COLOUR_RGB('',0.749019607843137,0.749019607843137,0.749019607843137);
ENDSEC;
END-ISO-10303-21;
