# Supplementary material for: 3-D printed injection system for capillary electrophoresis
Source: Royal Society of Chemistry journal article supplement (doi:10.1039/d2ay00075j), 2022-01-01
Supplement: d2ay00075j5.pdf [file d2ay00075j5.pdf]

*Supporting Information*

**3-D printed injection system for capillary electrophoresis**

Bonnie Jaskowski Hugel<sup>1\*</sup>, Kevin Young<sup>1</sup>, Caitlin Kerr<sup>1</sup>, Matthew M. Champion<sup>1,2</sup>,  
and Norman J. Dovichi<sup>1,2</sup>

<sup>1</sup>Department of Chemistry and Biochemistry, and <sup>2</sup>Berthiaume Institute for Precision Health,  
University of Notre Dame, Notre Dame, IN 46556 USA

email: bjaskows@nd.edu

Table S1. Typical conditions for reconditioning (flushing), electrokinetic injection, and separation using a 50  $\mu\text{m}$  i.d., 30 cm capillary.

Table S2. Typical conditions for reconditioning (flushing), pressure injection, and separation using a 50  $\mu\text{m}$  i.d., 30 cm capillary.

Figure S1. Log-Log calibration curve of peak amplitude using pressure injection.

STL and STEP files:

top-3-D-surface-geometry.stl,  
bottom-3-D-surface-geometry.stl,  
top-3-D-step-model.stp,  
bottom-3-D-step-model.stp.

Matlab m-files:

DeadTimeCorrection.m – This m-file corrects for photodiode deadtime, combines data from a primary and attenuated photo detectors, and applies matched smoothing to the Gaussian shaped peaks.

GausFilterMatrix.m – This m-file convolutes each column of a data matrix with a Gaussian function of specified width.

**Table S1.** Typical conditions for reconditioning (flushing), electrokinetic injection, and separation using a 50  $\mu\text{m}$  i.d., 30 cm capillary.

|                      | <b>Reagent</b>           | <b>Time (s)</b> | <b>Pressure (psi)</b> | <b>Voltage (kV)</b> |
|----------------------|--------------------------|-----------------|-----------------------|---------------------|
| Re-condition (flush) | 1 M NaOH                 | 120             | 7                     | 0                   |
|                      | ddH <sub>2</sub> O       | 120             | 7                     | 0                   |
|                      | 10 mM Sodium tetraborate | 120             | 7                     | 0                   |
| Injection            | Fluorescein sample       | 1               | 0                     | 1                   |
| Separation           | 10 mM Sodium tetraborate | 480*            | 0                     | 8                   |

*\*Length of run is sample-dependent*

**Table S2.** Typical conditions for reconditioning (flushing), pressure injection, and separation using a 50  $\mu\text{m}$  i.d., 30 cm capillary.

|                      | <b>Reagent</b>           | <b>Time (s)</b> | <b>Pressure (psi)</b> | <b>Voltage (kV)</b> |
|----------------------|--------------------------|-----------------|-----------------------|---------------------|
| Re-condition (flush) | 1 M NaOH                 | 120             | 7                     | 0                   |
|                      | ddH <sub>2</sub> O       | 120             | 7                     | 0                   |
|                      | 10 mM Sodium tetraborate | 120             | 7                     | 0                   |
| Injection            | Fluorescein sample       | 0.2             | 7                     | 0                   |
| Separation           | 10 mM Sodium tetraborate | 480*            | 0                     | 8                   |

*\*Length of run is sample-dependent*

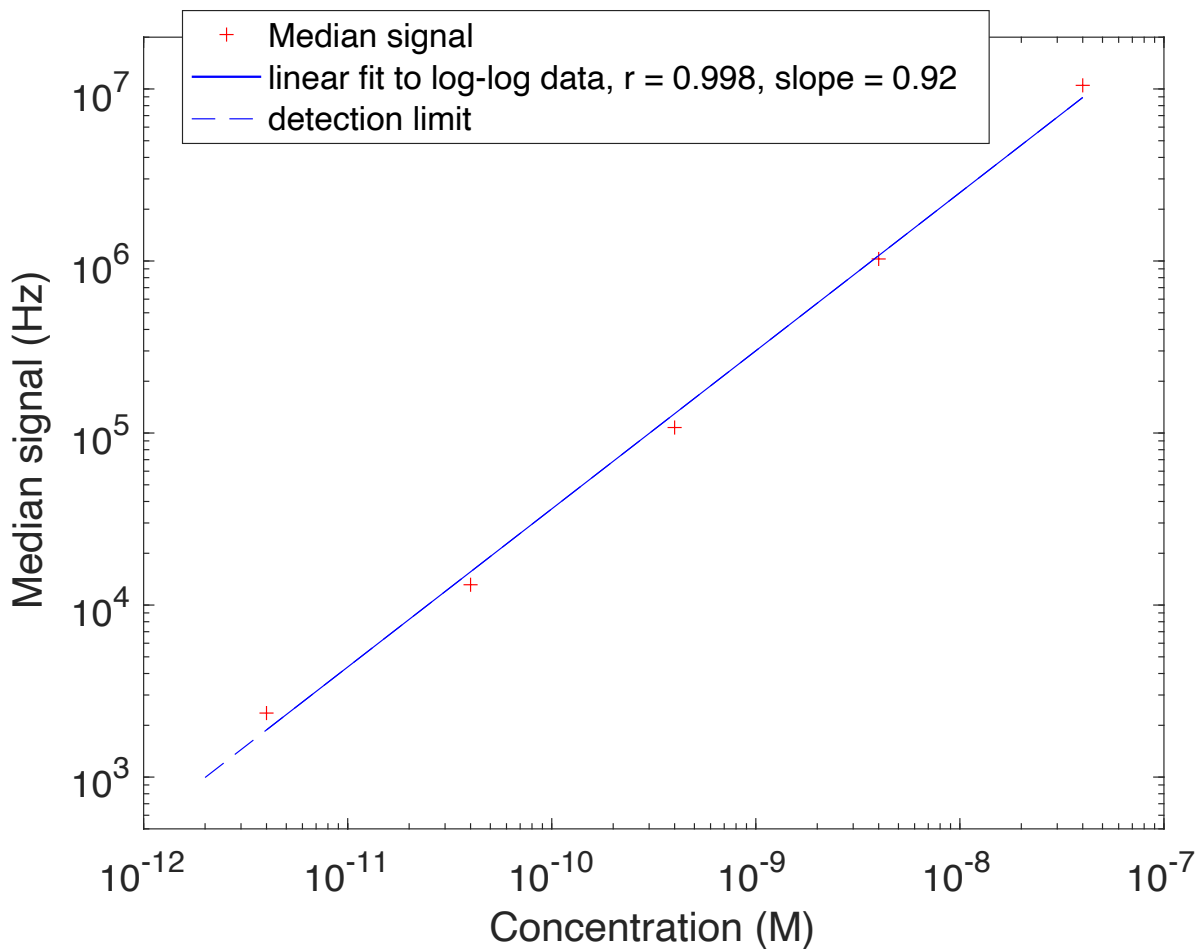

**Figure S1.** Log-Log calibration curve of peak amplitude using pressure injection of fluorescein samples ranging in concentration from 4 pM to 40 nM. Median detection limit is 2 pM. The calibration curve is extrapolated to the detection limit with a dashed line.
